# Supplementary material
Source: PubMed Central journal article supplement (PMC6154758)
Supplement: Supp_Table1.pdf [file Supp_Table1.pdf]

## Supplementary Data

SUPPLEMENTARY TABLE S1. ANTIMICROBIAL RESISTANCE GENES AND ENTEROTOXIN-ENCODING GENES OF *STAPHYLOCOCCUS* SPP. ISOLATES FROM HOSPITAL KITCHEN EQUIPMENT (BLENDER AND MIXER)

| Isolates | Origin  | Species                             | Resistance profiles | Minimum inhibitory concentration (µg/ml) |      |            |              | Resistance genes                              | Enterotoxin genes               |
|----------|---------|-------------------------------------|---------------------|------------------------------------------|------|------------|--------------|-----------------------------------------------|---------------------------------|
|          |         |                                     |                     | OX                                       | VAN  | CN         | E            |                                               |                                 |
| 8        | Mixer   | <i>Staphylococcus aureus</i>        |                     | 2                                        | 1    | <0.25      | 0.5          |                                               | <i>sen</i>                      |
| 24       | Mixer   | <i>S. aureus</i>                    | DA, E, P            | 0.25                                     | 1    | <0.25      | <b>2</b>     |                                               | <i>seg, sei, sen</i>            |
| 38       | Blender | <i>S. aureus</i>                    |                     | 0.5                                      | 2    | <0.25      | 0.5          |                                               | <i>sei, sen</i>                 |
| 39       | Mixer   | <i>S. aureus</i>                    |                     | 2                                        | 2    | <0.25      | 0.5          |                                               | <i>sen</i>                      |
| 32B'     | Mixer   | <i>S. aureus</i>                    |                     | 0.125                                    | 1    | <0.25      | 0.5          |                                               | <i>sen</i>                      |
| 5        | Blender | <i>S. aureus</i>                    |                     | 0.125                                    | 2    | 1          | 0.5          |                                               | <i>sen</i>                      |
| 11C      | Blender | <i>S. aureus</i>                    |                     | 0.125                                    | 1    | <0.25      | 0.5          |                                               | <i>sen</i>                      |
| 32 C     | Mixer   | <i>S. aureus</i>                    |                     | 0.5                                      | 1    | <0.25      | 0.5          |                                               | <i>seg, sei, sen</i>            |
| 14 B     | Blender | <i>Staphylococcus auricularis</i>   | P                   | 0.125                                    | 2    | <0.25      | 0.5          |                                               |                                 |
| 14A      | Blender | <i>S. auricularis</i>               | P                   | 0.25                                     | 1    | <0.25      | 0.5          |                                               |                                 |
| 1        | Blender | <i>Staphylococcus caprae</i>        | DA, E, TE           | 0.25                                     | 2    | <0.25      | <b>2</b>     |                                               |                                 |
| 34       | Mixer   | <i>S. caprae</i>                    | TE                  | 0.25                                     | 0.25 | <0.25      | 0.5          |                                               | <i>Sei</i>                      |
| 3A       | Blender | <i>S. caprae</i>                    | TE, CN              | 0.25                                     | 1    | <b>8</b>   | 0.5          | <i>aa(6')-aph(2'')</i>                        | <i>sen</i>                      |
| 36       | Blender | <i>S. caprae</i>                    | TE                  | 0.25                                     | 1    | <0.25      | 0.5          |                                               |                                 |
| 37       | Mixer   | <i>S. caprae</i>                    | TE                  | 0.25                                     | 1    | <0.25      | 0.5          |                                               | <i>sel, sem, seg, sei, sen</i>  |
| 20 A     | Blender | <i>S. caprae</i>                    | TE                  | <b>0.5</b>                               | 1    | <0.25      | 0.5          |                                               | <i>sen</i>                      |
| 3D       | Blender | <i>Staphylococcus cohnii</i>        | P                   | <b>0.5</b>                               | 2    | <0.25      | 0.5          |                                               | <i>sen</i>                      |
| 7        | Mixer   | <i>Staphylococcus epidermidis</i>   | CIP, E, FOX, P, CN  | <b>16</b>                                | 2    | <b>128</b> | <b>64</b>    | <i>aa(6')-aph(2'')</i> ,<br><i>mecA, ermA</i> | <i>sen</i>                      |
| 19       | Mixer   | <i>S. epidermidis</i>               | CIP, E, FOX, P, CN  | <b>16</b>                                | 2    | <b>16</b>  | <b>64</b>    | <i>aa(6')-aph(2'')</i> ,<br><i>mecA, ermB</i> | <i>sen</i>                      |
| 32 A     | Mixer   | <i>S. epidermidis</i>               | P                   | 0.125                                    | 2    | <0.25      | 0.5          |                                               | <i>sel, sem, seg, sei, sen</i>  |
| 32 B     | Mixer   | <i>S. epidermidis</i>               | P                   | 0.125                                    | 2    | <0.25      | 0.5          |                                               | <i>sel, seg, sei, sen</i>       |
| 21       | Mixer   | <i>Staphylococcus haemolyticus</i>  | TE, P               | 0.25                                     | 1    | 4          | <b>1</b>     |                                               | <i>sei, sen</i>                 |
| 33       | Blender | <i>S. haemolyticus</i>              | P                   | 0.125                                    | 1    | <0.25      | 0.5          |                                               | <i>Sei</i>                      |
| 2        | Blender | <i>Staphylococcus hominis</i>       | P, SXT, CN          | 0.063                                    | 2    | <b>128</b> | 0.5          | <i>aa(6')-aph(2'')</i>                        |                                 |
| 3B       | Blender | <i>S. hominis</i>                   | E                   | 0.125                                    | 1    | <0.25      | > <b>128</b> | <i>ermB</i>                                   | <i>Sen</i>                      |
| 12A      | Mixer   | <i>Staphylococcus kloosii</i>       | P                   | <b>0.5</b>                               | 2    | <0.25      | <b>1</b>     |                                               |                                 |
| 6        | Blender | <i>S. kloosii</i>                   | P                   | 0.125                                    | 1    | <0.25      | 0.5          |                                               | <i>sen</i>                      |
| 26       | Mixer   | <i>Staphylococcus pausteri</i>      | TE                  | 0.25                                     | 1    | <0.25      | 0.5          |                                               | <i>sel, seg, sei, sen</i>       |
| 16 A     | Blender | <i>S. pausteri</i>                  | DA, E, TE, CN       | 0.25                                     | 1    | <b>16</b>  | 0.5          | <i>aa(6')-aph(2'')</i>                        |                                 |
| 51       | Mixer   | <i>Staphylococcus saprophyticus</i> | E, P                | <b>1</b>                                 | 2    | <0.25      | <b>2</b>     |                                               | <i>sek, sem, seg, sei, sen</i>  |
| 54       | Mixer   | <i>S. saprophyticus</i>             | P                   | <b>1</b>                                 | 4    | <0.25      | 0.5          |                                               | <i>sek, sem, seg, sei, sen</i>  |
| 4        | Blender | <i>Staphylococcus simulans</i>      | TE, CN              | 0.25                                     | 1    | <b>32</b>  | 0.5          | <i>aa(6')-aph(2'')</i>                        | <i>sen</i>                      |
| 29       | Blender | <i>S. simulans</i>                  | TE                  | 0.25                                     | 1    | <0.25      | 0.5          |                                               | <i>sel, sen, sem, seg, sei,</i> |
| 15 B     | Blender | <i>Staphylococcus succinus</i>      |                     | 0.25                                     | 1    | <0.25      | 0.125        |                                               | <i>sen</i>                      |
| 27       | Mixer   | <i>Staphylococcus warneri</i>       | TE, P               | 0.25                                     | 2    | <0.25      | 0.5          |                                               | <i>sei, sen</i>                 |
| 17       | Mixer   | <i>S. warneri</i>                   | E, TE, P            | 0.25                                     | 1    | <0.25      | > <b>128</b> |                                               | <i>sen</i>                      |
| 23       | Blender | <i>S. warneri</i>                   | TE                  | 0.25                                     | 1    | <0.25      | 0.5          |                                               | <i>sel, seg, sei, sen</i>       |
| 28       | Mixer   | <i>S. warneri</i>                   | E, TE               | 0.25                                     | 1    | <0.25      | <b>1</b>     |                                               | <i>sen</i>                      |
| 35       | Blender | <i>S. warneri</i>                   | TE, CN              | 0.25                                     | 0.5  | <b>16</b>  | 0.5          | <i>aa(6')-aph(2'')</i>                        | <i>sen, sei</i>                 |
| 25       | Mixer   | <i>S. warneri</i>                   | TE, P               | <b>0.5</b>                               | 1    | <0.25      | 0.5          |                                               | <i>sel, sem, seg, sei, sen</i>  |

Values in bold represent resistance to antimicrobial.

P, penicillin; E, erythromycin; CN, gentamicin; DA, clindamycin; SXT, sulfamethoxazole/trimethoprim; TE, tetracycline; FOX, cefoxitin; CIP, ciprofloxacin; VAN, vancomycin; OX, oxacillin.
